# Supplementary material for: Fluctuations of the Stokes and anti-Stokes surface-enhanced resonance Raman scattering intensities in an electrochemical environment
Source: Royal Society of Chemistry journal article supplement (doi:10.1039/c0cc05360k), 2011-01-01
Supplement: c0cc05360k.pdf [file c0cc05360k.pdf]

## Supporting information

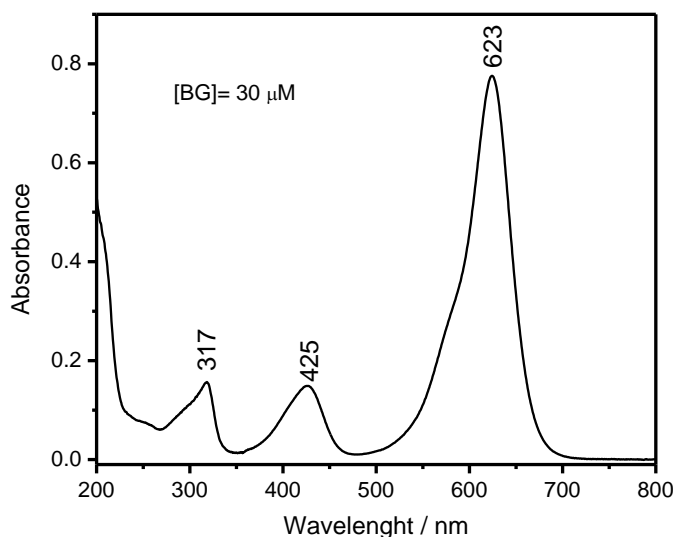

**Figure S1:** UV-Vis absorption spectrum of a 30  $\mu\text{M}$  BG aqueous solution.

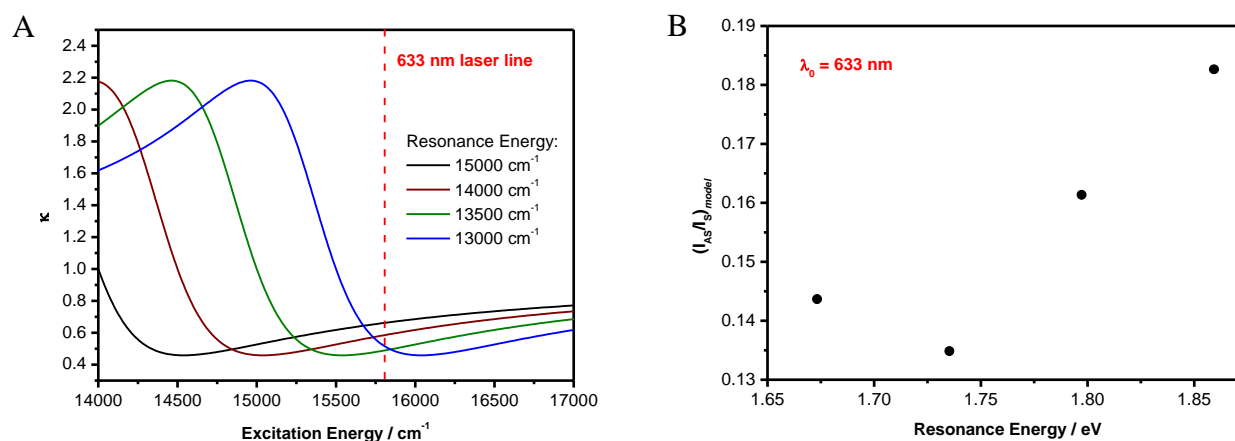

**Figure S2:** A) Curves of  $\kappa$  as a function of excitation energy for different resonance energies from the single model resonance of ref. 1 (a fixed  $\Gamma=500 \text{ cm}^{-1}$  was used). B) values for  $(I_{\text{AS}}/I_{\text{S}})_{\text{model}} = \kappa \cdot 0.28$  (where 0.28 is the expected thermal anti-Stokes/ Stokes ratio for the  $\sim 220 \text{ cm}^{-1}$  mode of BG calculated from equation (1) in the main manuscript). These  $\kappa$ -values were obtained from (a) at 633 nm excitation wavelength (marked in (a) as a red dashed line). Notice that the potential variation shown in (b) is in good agreement with the experimental data (Figure 2 in the main manuscript).

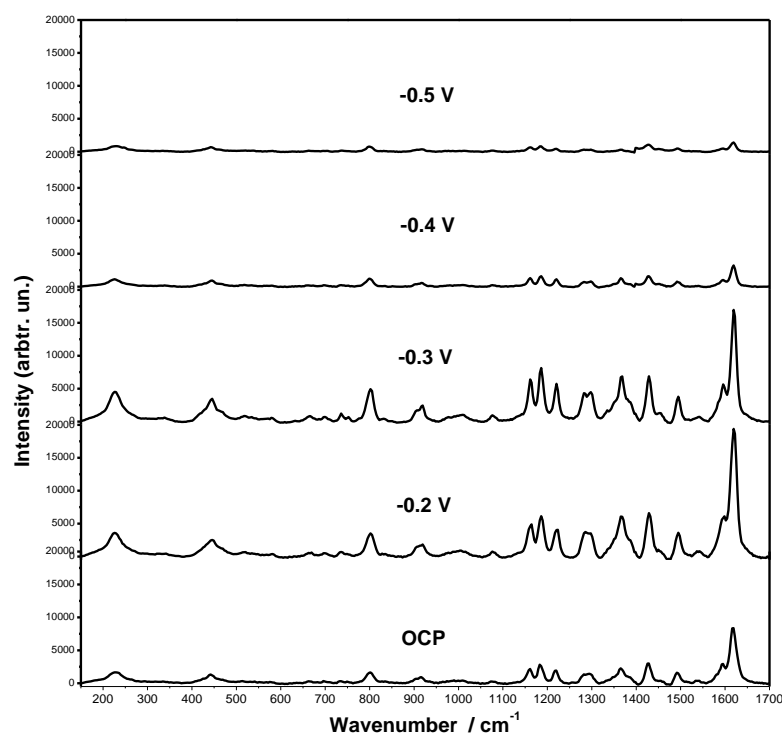

**Figure S3:** Average SERRS spectra of BG (5  $\mu\text{M}$ ) for different applied potentials as indicated in the figure.

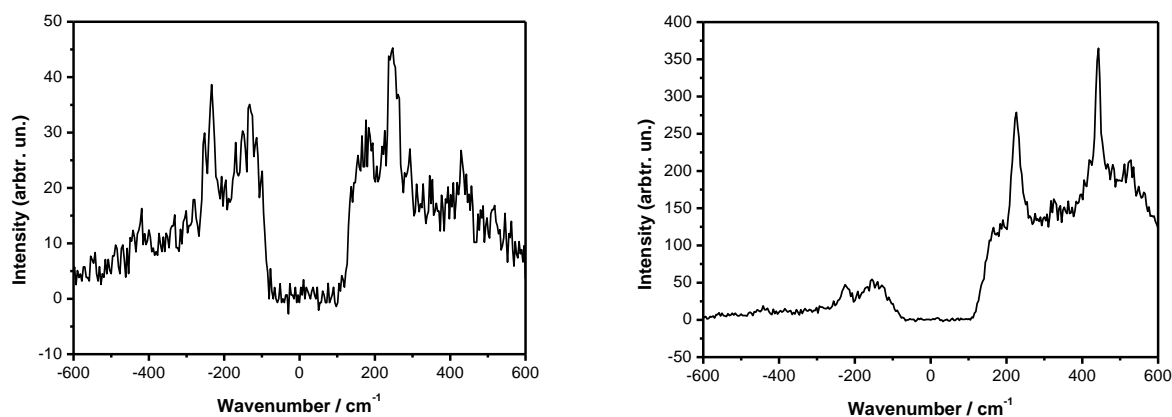

**Figure S4:** "Single-molecule" spectra from the data set with anti-Stokes enhanced (A) and Stokes enhanced scattering (B).

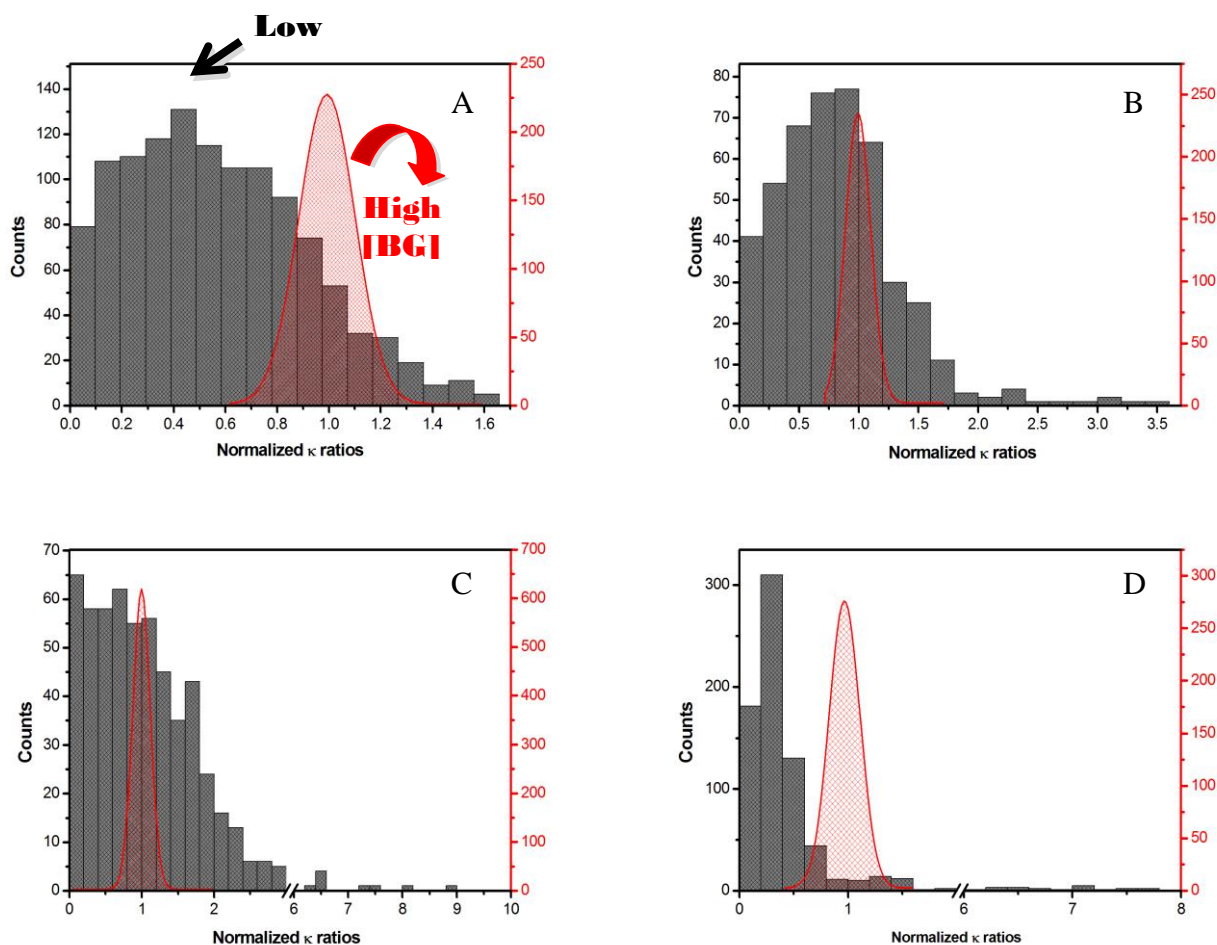

**Figure S5:** Histograms of  $\kappa$ -values for BG adsorbed on a roughened silver electrode (grey bars). [BG] = 20 nM, 0.1 M KBr. A) -0.1 V, B) -0.2 V, C) -0.3 V and D) -0.4 V. The shaded gaussian (in red) in each graph is a distribution in the average SERRS conditions (as in Figure 1).

## Reference

- 1- A. G. Brolo, A. C. Sanderson, A. P. Smith, *Phys. Rev. B*, 2004, **69**, 045424.
